# Supplementary material for: Institutional Interventions That Remove Barriers to Recruit and Retain Diverse Biomedical PhD Students
Source: Atypon-hosted journal article supplement (doi:10.1187/cbe.17-09-0210), 2018-05-11
Supplement: combinedsupmats.pdf [file combinedsupmats.pdf]

# Supplemental Material

*CBE—Life Sciences Education*

Wilson *et al.*

## Supplemental Figure 1.

The Graduate School. The GSBS is the degree-granting entity of two separate components of the University of Texas System that are both located within the Texas Medical Center (the largest medical center in the world): The University of Texas Health Sciences Center at Houston (UTHealth) and MD Anderson Cancer Center. The parent institutions award MS, PhD, and MD/PhD degrees through the GSBS and the 607 GSBS faculty members have primary appointments at MD Anderson Cancer Center or one of six schools within UTHealth (i.e. McGovern Medical School, School of Public Health, School of Dentistry, or School of Biomedical Informatics, and School of Nursing). GSBS students and faculty mentors have access to more than 60 core laboratory facilities and specialized instrumentation through these and other collaborative agreements. GSBS students and faculty conduct research at a number of different sites located in and around the Texas Medical Center, as well as at MD Anderson Cancer Center's Science Park campus located 120 miles from Houston, near Smithville, TX.

Doctoral Graduate Programs. A feature of the GSBS is that applicants are admitted as “undifferentiated” graduate students who may choose their specialization depending on their interests<sup>2</sup>. This umbrella admissions process allows considerable flexibility such that matriculating PhD students are not committed to a specific program, but rather may use their three first-year rotations to explore any GSBS laboratory. However, students must affiliate with one of 9 PhD Programs at the end of their first year at GSBS: Biochemistry and Cell Biology, Cancer Biology, Genetics and Epigenetics, Immunology, Medical Physics, Microbiology and Infectious Diseases, Neuroscience, Quantitative Sciences, and Therapeutics and Pharmacology.

Applicant review. Completed applications are initially separated based on quantitative criteria (GRE and GPA) into two groups (Tier I and Tier II) to facilitate review. Every Tier II applicant (those for which any of the three GRE percentile scores is less than 50% and/or in which the GPA is less than 3.0) is reviewed by four separate individuals in the Deans' office that have PhD degrees in the biomedical sciences. The review process involves reading each of the applications completely (letters, essays, grades) to prepare for a subsequent meeting in which all of the applications are discussed. Thus, every Tier II application is read and, based on these meeting discussions, moved from the Tier II into the Tier I group to be discussed by the full GSBS admissions committee (16 voting members) that has representation from all graduate programs. Admissions Committee members are not informed about whether an application had been originally assigned to the Tier I or II groups. Applications are assigned for review to three reviewers from the admissions committee with the primary reviewer typically being from a program of primary interest to the applicant. The admissions committee meetings proceed in a manner similar to NIH study sections where each applicant is presented by the primary, secondary, and tertiary reviewers followed by open discussion of each application. Scoring of each applicant is similar to NIH reviews in that area scores as well as an overall score are required. The committee is instructed to use the entire scoring range otherwise score compression will blunt the impact of their recommendations. The scoring range scale is from 1 – 9 (1=most qualified and 9=lowest qualified) in whole numbers (see below).

The admissions committee. The admissions committee is composed of 16 faculty members, the Associate Dean of Admissions, and the Assistant Director of Admissions. Faculty members are full voting members, while others serve in an *ex officio* capacity. Members of the committee receive copies of applications one week in advance of a meeting, and three members are assigned to review and score each application based on the criteria above. Applications are discussed in alphabetical order in NIH

study section format in which comments from the primary, secondary and tertiary reviewers are followed by an additional question and comment period from other committee members. Following the discussion, the three reviewers offer final scores for the applicant that provides a range for the scoring by other committee members, and each member submits their final score for that applicant. Applicants that receive the highest scores from the committee are invited for interviews. The anticipated GSBS budget and an estimate of the number of acceptances of offers of admission are considered when planning for the size of an entering class. The in-person interview evaluation is used by the Deans as an additional guide to the final admissions decision.

Categories included in each applicant review (scored individually and total score). Members of the admissions committee consider these factors in aggregate, without any formula or distribution of weight, to determine whether an applicant is offered an in-person interview for admission into the graduate school.

1. *Research Experience* (information in research statement and reference letters)

- Quality and duration of research experience
- Ability to communicate accomplishments effectively
- Achievement (e.g., presentations, publications, meeting attendance)

2. *Recommendation letters*

- How well recommender knows candidate
- Role of recommender in training candidate
- Recommendation for research career

3. *Research and Personal Statements; Optional Essay*

- Description of research training experience
- Quality (and quantity) of experience
- Accomplishments, e.g., meeting presentations, publications
- Defined career objectives
- Supplementary essay information

Non-academic responsibilities (e.g. employment)

Race, ethnicity and socio-economic status to the extent that it may have disadvantaged the applicant

4. *Quantitative Measures* (Undergraduate and graduate)

- Trends in academic performance (improving, declining, maintaining high level)
- Honors and awards
- Achievement in science-related coursework, e.g., content, amount, grades, level of instruction (higher level undergrad, grad)
- Whether barriers were present to obtaining quality education, how these were overcome
- Academic institution (positive only).

- Performance on GRE
- International applicants
  - English language competency
  - TOEFL score

#### Applicant scoring criteria

*Score of 1: Exceptional* – a once every year or two application; any one reviewer will have AT MOST one such application per year; most reviewers will not have a “1”. An example applicant would have all “A” grades, high GRE scores, glowing/compelling letters of support, and one (or more) publications (perhaps 1st author). These applicants are potential merit scholarship awardees.

*Score of 2: Outstanding* – top 10%; in many ways a ‘can’t miss applicant’ but lacks some quality present in exceptional applications (e.g. publications, quantity/quality of research experience). Actively recruit.

*Score of 3: Excellent* – top 20%; a potentially high impact applicant; nonetheless, some aspects of the application (e.g. quantitative measures, essay) render it less impressive than outstanding applications. Actively recruit.

*Score of 4: Very good* – top 40%; the applicant has much going for them, with strengths clearly outweighing weaknesses; a few areas are of less high quality compared to the 1-3 applicants. These applicants are similar to some of the current students who have been successful in graduate school.

*Score of 5: Good* – average applicant; strengths outweigh weaknesses by a little bit; however, there are obvious problems (e.g. quantitative measures, letters not as outstanding, little research experience).

*Score of 6: Satisfactory* – bottom 40%; strengths equal weaknesses; many positives but also many negatives weaken enthusiasm.

*Score of 7: Fair* – bottom 20%; weaknesses outnumber strengths. This applicant is weaker than the current student population.

*Score of 8: Marginal* – bottom 10%; perhaps no fatal flaw (e.g. complete lack of research experience) but many problems with the applicant.

*Score of 9: Poor* – a once every year or two application; unacceptable scores for almost all criteria.

Supplemental Figure 2. One-way ANOVA with post hoc Tukey test.

SAMPLES

Sample 1=2004-2004

Sample 2=2008-2009

Sample 3=2012-2013

Sample 4=2016-2017

BLACK MALE GPA

*Data Summary*

|             | Samples |        |        |        |   |        |
|-------------|---------|--------|--------|--------|---|--------|
|             | 1       | 2      | 3      | 4      | 5 | Total  |
| N           | 2       | 5      | 2      | 2      |   | 11     |
| $-\sum X$   | 7       | 16     | 5.4    | 5.4    |   | 33.8   |
| -Mean       | 3.5     | 3.2    | 2.7    | 2.7    |   | 3.0727 |
| $-\sum X^2$ | 24.82   | 51.9   | 14.76  | 14.76  |   | 106.24 |
| Variance    | 0.32    | 0.175  | 0.18   | 0.18   |   | 0.2382 |
| Std.Dev.    | 0.5657  | 0.4183 | 0.4243 | 0.4243 |   | 0.488  |
| Std.Err.    | 0.4     | 0.1871 | 0.3    | 0.3    |   | 0.1471 |

| Source                        | SS     | df | MS     | F    | P        |
|-------------------------------|--------|----|--------|------|----------|
| Treatment<br>[between groups] | 1.0018 | 3  | 0.3339 | 1.69 | 0.255185 |
| Error                         | 1.38   | 7  | 0.1971 |      |          |
| Ss/Bl                         |        |    |        |      |          |
| Total                         | 2.3818 | 10 |        |      |          |

BLACK MALE GRE-Q

*Data Summary*

|           | Samples |      |     |     |   |         |
|-----------|---------|------|-----|-----|---|---------|
|           | 1       | 2    | 3   | 4   | 5 | Total   |
| N         | 2       | 5    | 2   | 2   |   | 11      |
| $-\sum X$ | 95      | 279  | 112 | 142 |   | 628     |
| -Mean     | 47.5    | 55.8 | 56  | 71  |   | 57.0909 |

|             |         |         |         |       |  |          |
|-------------|---------|---------|---------|-------|--|----------|
| $-\sum X^2$ | 5353    | 18183   | 6722    | 10082 |  | 40340    |
| Variance    | 840.5   | 653.7   | 450     | 0     |  | 448.6909 |
| Std.Dev.    | 28.9914 | 25.5676 | 21.2132 | 0     |  | 21.1823  |
| Std.Err.    | 20.5    | 11.4342 | 15      | 0     |  | 6.3867   |

| Source                        | SS        | df | MS       | F    | P        |
|-------------------------------|-----------|----|----------|------|----------|
| Treatment<br>[between groups] | 581.6091  | 3  | 193.8697 | 0.35 | 0.790720 |
| Error                         | 3905.3    | 7  | 557.9    |      |          |
| Ss/Bl                         |           |    |          |      |          |
| Total                         | 4486.9091 | 10 |          |      |          |

### BLACK MALE GRE V

| <i>Data Summary</i> |         |         |         |         |   |          |
|---------------------|---------|---------|---------|---------|---|----------|
|                     | Samples |         |         |         |   |          |
|                     | 1       | 2       | 3       | 4       | 5 | Total    |
| N                   | 2       | 5       | 2       | 2       |   | 11       |
| $-\sum X$           | 69      | 194     | 106     | 156     |   | 525      |
| -Mean               | 34.5    | 38.8    | 53      | 78      |   | 47.7273  |
| $-\sum X^2$         | 3141    | 8398    | 6196    | 12296   |   | 30031    |
| Variance            | 760.5   | 217.7   | 578     | 128     |   | 497.4182 |
| Std.Dev.            | 27.5772 | 14.7547 | 24.0416 | 11.3137 |   | 22.3029  |
| Std.Err.            | 19.5    | 6.5985  | 17      | 8       |   | 6.7246   |

| Source                        | SS        | df | MS       | F    | P        |
|-------------------------------|-----------|----|----------|------|----------|
| Treatment<br>[between groups] | 2636.8818 | 3  | 878.9606 | 2.63 | 0.131828 |
| Error                         | 2337.3    | 7  | 333.9    |      |          |
| Ss/Bl                         |           |    |          |      |          |
| Total                         | 4974.1818 | 10 |          |      |          |

### HISPANIC MALE GRE Q

| <i>Data Summary</i> |         |          |          |          |   |          |
|---------------------|---------|----------|----------|----------|---|----------|
|                     | Samples |          |          |          |   |          |
|                     | 1       | 2        | 3        | 4        | 5 | Total    |
| N                   | 10      | 17       | 12       | 11       |   | 50       |
| $-\sum X$           | 574     | 959      | 731      | 842      |   | 3106     |
| -Mean               | 57.4    | 56.4118  | 60.9167  | 76.5455  |   | 62.12    |
| $-\sum X^2$         | 37228   | 62907    | 51847    | 67300    |   | 219282   |
| Variance            | 475.6   | 550.5074 | 665.1742 | 284.8727 |   | 537.4955 |
| Std.Dev.            | 21.8083 | 23.4629  | 25.791   | 16.8782  |   | 23.1839  |
| Std.Err.            | 6.8964  | 5.6906   | 7.4452   | 5.089    |   | 3.2787   |

| Source                        | SS         | df | MS        | F    | P        |
|-------------------------------|------------|----|-----------|------|----------|
| Treatment<br>[between groups] | 3083.1184  | 3  | 1027.7061 | 2.03 | 0.122807 |
| Error                         | 23254.1616 | 46 | 505.5253  |      |          |
| Ss/Bl                         |            |    |           |      |          |
| Total                         | 26337.28   | 49 |           |      |          |

### HISPANIC MALE GRE V

| <i>Data Summary</i> |          |          |          |          |   |          |
|---------------------|----------|----------|----------|----------|---|----------|
|                     | Samples  |          |          |          |   |          |
|                     | 1        | 2        | 3        | 4        | 5 | Total    |
| N                   | 10       | 24       | 14       | 12       |   | 60       |
| $-\sum X$           | 559      | 1352     | 818      | 826      |   | 3555     |
| -Mean               | 55.9     | 56.3333  | 58.4286  | 68.8333  |   | 59.25    |
| $-\sum X^2$         | 36225    | 88942    | 59046    | 61150    |   | 245363   |
| Variance            | 552.9889 | 555.6232 | 865.4945 | 390.3333 |   | 588.6314 |

|          |         |         |         |         |  |         |
|----------|---------|---------|---------|---------|--|---------|
| Std.Dev. | 23.5157 | 23.5717 | 29.4193 | 19.7569 |  | 24.2617 |
| Std.Err. | 7.4363  | 4.8115  | 7.8626  | 5.7033  |  | 3.1322  |

| Source                        | SS         | df | MS       | F   | P        |
|-------------------------------|------------|----|----------|-----|----------|
| Treatment<br>[between groups] | 1427.9214  | 3  | 475.9738 | 0.8 | 0.499103 |
| Error                         | 33301.3286 | 56 | 594.6666 |     |          |
| Ss/Bl                         |            |    |          |     |          |
| Total                         | 34729.25   | 59 |          |     |          |

### HISPANIC MALE GPA

| <i>Data Summary</i> |         |        |          |          |   |          |
|---------------------|---------|--------|----------|----------|---|----------|
|                     | Samples |        |          |          |   |          |
|                     | 1       | 2      | 3        | 4        | 5 | Total    |
| N                   | 10      | 17     | 12       | 11       |   | 50       |
| $-\sum X$           | 32      | 55.3   | 37.309   | 36.859   |   | 161.468  |
| -Mean               | 3.2     | 3.2529 | 3.1091   | 3.3508   |   | 3.2294   |
| $-\sum X^2$         | 104.04  | 182.37 | 117.7077 | 125.0242 |   | 529.1419 |
| Variance            | 0.1822  | 0.1551 | 0.1555   | 0.1516   |   | 0.1572   |
| Std.Dev.            | 0.4269  | 0.3939 | 0.3944   | 0.3894   |   | 0.3965   |
| Std.Err.            | 0.135   | 0.0955 | 0.1138   | 0.1174   |   | 0.0561   |

| Source                        | SS     | df | MS     | F    | P        |
|-------------------------------|--------|----|--------|------|----------|
| Treatment<br>[between groups] | 0.3539 | 3  | 0.118  | 0.74 | 0.533653 |
| Error                         | 7.3496 | 46 | 0.1598 |      |          |
| Ss/Bl                         |        |    |        |      |          |
| Total                         | 7.7036 | 49 |        |      |          |



ASIAN MALE GRE Q

| <i>Data Summary</i> |         |         |          |          |   |          |
|---------------------|---------|---------|----------|----------|---|----------|
|                     | Samples |         |          |          |   |          |
|                     | 1       | 2       | 3        | 4        | 5 | Total    |
| N                   | 15      | 11      | 13       | 11       |   | 50       |
| $-\sum X$           | 1223    | 918     | 1059     | 915      |   | 4115     |
| -Mean               | 81.5333 | 83.4545 | 81.4615  | 83.1818  |   | 82.3     |
| $-\sum X^2$         | 100515  | 77284   | 90129    | 78593    |   | 346521   |
| Variance            | 57.1238 | 67.2727 | 321.7692 | 248.1636 |   | 160.3367 |
| Std.Dev.            | 7.558   | 8.202   | 17.9379  | 15.7532  |   | 12.6624  |
| Std.Err.            | 1.9515  | 2.473   | 4.9751   | 4.7498   |   | 1.7907   |

| Source                        | SS        | df | MS       | F    | P        |
|-------------------------------|-----------|----|----------|------|----------|
| Treatment<br>[between groups] | 41.1723   | 3  | 13.7241  | 0.08 | 0.970548 |
| Error                         | 7815.3277 | 46 | 169.8984 |      |          |
| Ss/Bl                         |           |    |          |      |          |
| Total                         | 7856.5    | 49 |          |      |          |

ASIAN MALE GRE V

| <i>Data Summary</i> |          |          |          |          |   |          |
|---------------------|----------|----------|----------|----------|---|----------|
|                     | Samples  |          |          |          |   |          |
|                     | 1        | 2        | 3        | 4        | 5 | Total    |
| N                   | 15       | 11       | 13       | 11       |   | 50       |
| $-\sum X$           | 1043     | 761      | 1035     | 820      |   | 3659     |
| -Mean               | 69.5333  | 69.1818  | 79.6154  | 74.5455  |   | 73.18    |
| $-\sum X^2$         | 85181    | 56881    | 85503    | 64158    |   | 291723   |
| Variance            | 904.1238 | 423.3636 | 258.4231 | 303.0727 |   | 488.9261 |
| Std.Dev.            | 30.0687  | 20.5758  | 16.0755  | 17.409   |   | 22.1117  |

|          |        |        |        |       |  |        |
|----------|--------|--------|--------|-------|--|--------|
| Std.Err. | 7.7637 | 6.2038 | 4.4586 | 5.249 |  | 3.1271 |
|----------|--------|--------|--------|-------|--|--------|

| Source                        | SS         | df | MS       | F    | P        |
|-------------------------------|------------|----|----------|------|----------|
| Treatment<br>[between groups] | 934.2061   | 3  | 311.402  | 0.62 | 0.605632 |
| Error                         | 23023.1739 | 46 | 500.5038 |      |          |
| Ss/Bl                         |            |    |          |      |          |
| Total                         | 23957.38   | 49 |          |      |          |

#### ASIAN MALE GPA

| <i>Data Summary</i> |          |          |          |         |   |          |
|---------------------|----------|----------|----------|---------|---|----------|
|                     | Samples  |          |          |         |   |          |
|                     | 1        | 2        | 3        | 4       | 5 | Total    |
| N                   | 15       | 11       | 13       | 11      |   | 50       |
| $-\sum X$           | 48.146   | 37.874   | 42.3     | 35.98   |   | 164.3    |
| -Mean               | 3.2097   | 3.4431   | 3.2538   | 3.2709  |   | 3.286    |
| $-\sum X^2$         | 156.4967 | 131.6295 | 140.6822 | 120.392 |   | 549.2004 |
| Variance            | 0.1401   | 0.1226   | 0.2537   | 0.2705  |   | 0.19     |
| Std.Dev.            | 0.3743   | 0.3501   | 0.5037   | 0.5201  |   | 0.4359   |
| Std.Err.            | 0.0966   | 0.1056   | 0.1397   | 0.1568  |   | 0.0616   |

| Source                        | SS     | df | MS     | F    | P        |
|-------------------------------|--------|----|--------|------|----------|
| Treatment<br>[between groups] | 0.3746 | 3  | 0.1249 | 0.64 | 0.593163 |
| Error                         | 8.9359 | 46 | 0.1943 |      |          |
| Ss/Bl                         |        |    |        |      |          |
| Total                         | 9.3106 | 49 |        |      |          |

#### NATIVE MALE GRE Q

| <i>Data Summary</i> |         |   |   |   |   |       |
|---------------------|---------|---|---|---|---|-------|
|                     | Samples |   |   |   |   |       |
|                     | 1       | 2 | 3 | 4 | 5 | Total |

|                               |     |      |      |         |   |          |
|-------------------------------|-----|------|------|---------|---|----------|
| N                             | 0   | 0    | 1    | 2       |   | 3        |
| $-\sum X$                     | 0   | 0    | 47   | 142     |   | 189      |
| -Mean                         | NaN | NaN  | 47   | 71      |   | 63       |
| $-\sum X^2$                   | 0   | 0    | 2209 | 11234   |   | 13443    |
| Variance                      | NaN | NaN  | NaN  | 1152    |   | 768      |
| Std.Dev.                      | NaN | NaN  | NaN  | 33.9411 |   | 27.7128  |
| Std.Err.                      | NaN | NaN  | NaN  | 24      |   | 16       |
| Source                        |     | SS   | df   | MS      | F | P        |
| Treatment<br>[between groups] |     | NaN  | 3    | NaN     | 0 | 1.000000 |
| Error                         |     | NaN  | -1   | NaN     |   |          |
| Ss/BI                         |     |      |      |         |   |          |
| Total                         |     | 1536 | 2    |         |   |          |

#### NATIVE MALE GRE V

| <i>Data Summary</i>           |         |     |      |        |   |          |
|-------------------------------|---------|-----|------|--------|---|----------|
|                               | Samples |     |      |        |   |          |
|                               | 1       | 2   | 3    | 4      | 5 | Total    |
| N                             | 0       | 0   | 1    | 2      |   | 3        |
| $-\sum X$                     | 0       | 0   | 57   | 128    |   | 185      |
| -Mean                         | NaN     | NaN | 57   | 64     |   | 61.6667  |
| $-\sum X^2$                   | 0       | 0   | 3249 | 8290   |   | 11539    |
| Variance                      | NaN     | NaN | NaN  | 98     |   | 65.3333  |
| Std.Dev.                      | NaN     | NaN | NaN  | 9.8995 |   | 8.0829   |
| Std.Err.                      | NaN     | NaN | NaN  | 7      |   | 4.6667   |
| Source                        |         | SS  | df   | MS     | F | P        |
| Treatment<br>[between groups] |         | NaN | 3    | NaN    | 0 | 1.000000 |
| Error                         |         | NaN | -1   | NaN    |   |          |
| Ss/BI                         |         |     |      |        |   |          |

Total 130.6667 2

NATIVE MALE GPA

| <i>Data Summary</i> |         |     |        |         |   |         |
|---------------------|---------|-----|--------|---------|---|---------|
|                     | Samples |     |        |         |   |         |
|                     | 1       | 2   | 3      | 4       | 5 | Total   |
| N                   | 0       | 0   | 1      | 2       |   | 3       |
| $-\sum X$           | 0       | 0   | 3.15   | 6.68    |   | 9.83    |
| -Mean               | NaN     | NaN | 3.15   | 3.34    |   | 3.2767  |
| $-\sum X^2$         | 0       | 0   | 9.9225 | 22.3834 |   | 32.3059 |
| Variance            | NaN     | NaN | NaN    | 0.0722  |   | 0.0481  |
| Std.Dev.            | NaN     | NaN | NaN    | 0.2687  |   | 0.2194  |
| Std.Err.            | NaN     | NaN | NaN    | 0.19    |   | 0.1267  |

| Source                        | SS     | df | MS  | F | P        |
|-------------------------------|--------|----|-----|---|----------|
| Treatment<br>[between groups] | NaN    | 3  | NaN | 0 | 1.000000 |
| Error                         | NaN    | -1 | NaN |   |          |
| Ss/Bl                         |        |    |     |   |          |
| Total                         | 0.0963 | 2  |     |   |          |

WHITE MALE GRE Q

| <i>Data Summary</i> |          |          |          |          |   |          |
|---------------------|----------|----------|----------|----------|---|----------|
|                     | Samples  |          |          |          |   |          |
|                     | 1        | 2        | 3        | 4        | 5 | Total    |
| N                   | 70       | 64       | 68       | 60       |   | 262      |
| $-\sum X$           | 5215     | 4635     | 5097     | 4601     |   | 19548    |
| -Mean               | 74.5     | 72.4219  | 74.9559  | 76.6833  |   | 74.6107  |
| $-\sum X^2$         | 400687   | 351131   | 397129   | 364113   |   | 1513060  |
| Variance            | 176.3696 | 245.3271 | 225.0577 | 191.4065 |   | 209.0816 |

|          |         |         |         |        |  |         |
|----------|---------|---------|---------|--------|--|---------|
| Std.Dev. | 13.2804 | 15.6629 | 15.0019 | 13.835 |  | 14.4597 |
| Std.Err. | 1.5873  | 1.9579  | 1.8193  | 1.7861 |  | 0.8933  |

| Source                        | SS         | df  | MS       | F    | P        |
|-------------------------------|------------|-----|----------|------|----------|
| Treatment<br>[between groups] | 573.3297   | 3   | 191.1099 | 0.91 | 0.436686 |
| Error                         | 53996.9604 | 258 | 209.2905 |      |          |
| Ss/Bl                         |            |     |          |      |          |
| Total                         | 54570.2901 | 261 |          |      |          |

### WHITE MALE GRE V

| <i>Data Summary</i> |          |          |          |          |   |          |
|---------------------|----------|----------|----------|----------|---|----------|
|                     | Samples  |          |          |          |   | Total    |
|                     | 1        | 2        | 3        | 4        | 5 |          |
| N                   | 70       | 64       | 68       | 60       |   | 262      |
| $-\sum X$           | 4597     | 4359     | 4970     | 4526     |   | 18452    |
| -Mean               | 65.6714  | 68.1094  | 73.0882  | 75.4333  |   | 70.4275  |
| $-\sum X^2$         | 333979   | 319841   | 383756   | 360938   |   | 1398514  |
| Variance            | 465.0354 | 364.3212 | 306.0817 | 330.9616 |   | 379.2572 |
| Std.Dev.            | 21.5647  | 19.0872  | 17.4952  | 18.1923  |   | 19.4745  |
| Std.Err.            | 2.5775   | 2.3859   | 2.1216   | 2.3486   |   | 1.2031   |

| Source                        | SS         | df  | MS        | F    | P        |
|-------------------------------|------------|-----|-----------|------|----------|
| Treatment<br>[between groups] | 3912.241   | 3   | 1304.0803 | 3.54 | 0.015262 |
| Error                         | 95073.8812 | 258 | 368.5034  |      |          |
| Ss/Bl                         |            |     |           |      |          |
| Total                         | 98986.1221 | 261 |           |      |          |

### *Tukey HSD Test*

HSD[.05]=8.69; HSD[.01]=10.58

M1 vs M2 nonsignificant M1 vs M3 nonsignificant M1 vs M4 P<.05

M2 vs M3 nonsignificant M2 vs M4 nonsignificant M3 vs M4 nonsignificant

M1 = mean of Sample 1

M2 = mean of Sample 2 and so forth.

HSD = the absolute [unsigned] difference between any two sample means required for significance at the designated level. HSD[.05] for the .05 level; HSD[.01] for the .01 level.

### WHITE MALE GPA

| <i>Data Summary</i> |          |        |          |          |   |           |
|---------------------|----------|--------|----------|----------|---|-----------|
|                     | Samples  |        |          |          |   |           |
|                     | 1        | 2      | 3        | 4        | 5 | Total     |
| N                   | 70       | 64     | 68       | 60       |   | 262       |
| $-\sum X$           | 228.97   | 212.5  | 225.907  | 207.088  |   | 874.465   |
| -Mean               | 3.271    | 3.3203 | 3.3222   | 3.4515   |   | 3.3377    |
| $-\sum X^2$         | 756.9439 | 714.67 | 760.9536 | 722.3314 |   | 2954.8989 |
| Variance            | 0.1157   | 0.1445 | 0.156    | 0.1284   |   | 0.1388    |
| Std.Dev.            | 0.3401   | 0.3801 | 0.395    | 0.3583   |   | 0.3726    |
| Std.Err.            | 0.0407   | 0.0475 | 0.0479   | 0.0463   |   | 0.023     |

| Source                        | SS      | df  | MS     | F    | P        |
|-------------------------------|---------|-----|--------|------|----------|
| Treatment<br>[between groups] | 1.1238  | 3   | 0.3746 | 2.75 | 0.043273 |
| Error                         | 35.1147 | 258 | 0.1361 |      |          |
| Ss/Bl                         |         |     |        |      |          |
| Total                         | 36.2385 | 261 |        |      |          |

### *Tukey HSD Test*

HSD[.05]=0.17; HSD[.01]=0.2

M1 vs M2 nonsignificant M1 vs M3 nonsignificant M1 vs M4 P<.05

M2 vs M3 nonsignificant M2 vs M4 nonsignificant M3 vs M4 nonsignificant

M1 = mean of Sample 1

M2 = mean of Sample 2 and so forth.

HSD = the absolute [unsigned] difference between any two sample means required for

significance at the designated level. HSD[.05] for the .05 level; HSD[.01] for the .01 level.

### DISABLED MALE GRE Q

#### Data Summary

|             | Samples |     |      |         |   |          |
|-------------|---------|-----|------|---------|---|----------|
|             | 1       | 2   | 3    | 4       | 5 | Total    |
| N           | 0       | 0   | 1    | 5       |   | 6        |
| $-\sum X$   | 0       | 0   | 47   | 360     |   | 407      |
| -Mean       | NaN     | NaN | 47   | 72      |   | 67.8333  |
| $-\sum X^2$ | 0       | 0   | 2209 | 26796   |   | 29005    |
| Variance    | NaN     | NaN | NaN  | 219     |   | 279.3667 |
| Std.Dev.    | NaN     | NaN | NaN  | 14.7986 |   | 16.7143  |
| Std.Err.    | NaN     | NaN | NaN  | 6.6182  |   | 6.8236   |

| Source                        | SS        | df | MS  | F | P        |
|-------------------------------|-----------|----|-----|---|----------|
| Treatment<br>[between groups] | NaN       | 3  | NaN | 0 | 1.000000 |
| Error                         | NaN       | 2  | NaN |   |          |
| Ss/Bl                         |           |    |     |   |          |
| Total                         | 1396.8333 | 5  |     |   |          |

### DISABLED MALE GRE V

#### Data Summary

|             | Samples |     |      |         |   |          |
|-------------|---------|-----|------|---------|---|----------|
|             | 1       | 2   | 3    | 4       | 5 | Total    |
| N           | 0       | 0   | 1    | 5       |   | 6        |
| $-\sum X$   | 0       | 0   | 57   | 331     |   | 388      |
| -Mean       | NaN     | NaN | 57   | 66.2    |   | 64.6667  |
| $-\sum X^2$ | 0       | 0   | 3249 | 23501   |   | 26750    |
| Variance    | NaN     | NaN | NaN  | 397.2   |   | 331.8667 |
| Std.Dev.    | NaN     | NaN | NaN  | 19.9299 |   | 18.2172  |

|                               |     |           |     |        |   |          |
|-------------------------------|-----|-----------|-----|--------|---|----------|
| Std.Err.                      | NaN | NaN       | NaN | 8.9129 |   | 7.4371   |
| Source                        |     | SS        | df  | MS     | F | P        |
| Treatment<br>[between groups] |     | NaN       | 3   | NaN    | 0 | 1.000000 |
| Error                         |     | NaN       | 2   | NaN    |   |          |
| Ss/Bl                         |     |           |     |        |   |          |
| Total                         |     | 1659.3333 | 5   |        |   |          |

### DISABLED MALE GPA

| <i>Data Summary</i> |         |     |        |         |   |         |
|---------------------|---------|-----|--------|---------|---|---------|
|                     | Samples |     |        |         |   |         |
|                     | 1       | 2   | 3      | 4       | 5 | Total   |
| N                   | 0       | 0   | 1      | 5       |   | 6       |
| $-\sum X$           | 0       | 0   | 3.15   | 16.873  |   | 20.023  |
| -Mean               | NaN     | NaN | 3.15   | 3.3746  |   | 3.3372  |
| $-\sum X^2$         | 0       | 0   | 9.9225 | 57.1689 |   | 67.0914 |
| Variance            | NaN     | NaN | NaN    | 0.0573  |   | 0.0543  |
| Std.Dev.            | NaN     | NaN | NaN    | 0.2394  |   | 0.2329  |
| Std.Err.            | NaN     | NaN | NaN    | 0.1071  |   | 0.0951  |

|                               |  |        |    |     |   |          |
|-------------------------------|--|--------|----|-----|---|----------|
| Source                        |  | SS     | df | MS  | F | P        |
| Treatment<br>[between groups] |  | NaN    | 3  | NaN | 0 | 1.000000 |
| Error                         |  | NaN    | 2  | NaN |   |          |
| Ss/Bl                         |  |        |    |     |   |          |
| Total                         |  | 0.2713 | 5  |     |   |          |



BLACK FEMALE GRE Q

| <i>Data Summary</i> |         |          |          |          |   |          |
|---------------------|---------|----------|----------|----------|---|----------|
|                     | Samples |          |          |          |   |          |
|                     | 1       | 2        | 3        | 4        | 5 | Total    |
| N                   | 6       | 11       | 8        | 11       |   | 36       |
| $-\sum X$           | 262     | 410      | 377      | 559      |   | 1608     |
| -Mean               | 43.6667 | 37.2727  | 47.125   | 50.8182  |   | 44.6667  |
| $-\sum X^2$         | 11858   | 17724    | 20283    | 31869    |   | 81734    |
| Variance            | 83.4667 | 244.2182 | 359.5536 | 346.1636 |   | 283.1429 |
| Std.Dev.            | 9.136   | 15.6275  | 18.9619  | 18.6055  |   | 16.8268  |
| Std.Err.            | 3.7298  | 4.7119   | 6.704    | 5.6098   |   | 2.8045   |

| Source                        | SS        | df | MS       | F    | P        |
|-------------------------------|-----------|----|----------|------|----------|
| Treatment<br>[between groups] | 1071.9735 | 3  | 357.3245 | 1.29 | 0.294638 |
| Error                         | 8838.0265 | 32 | 276.1883 |      |          |
| Ss/Bl                         |           |    |          |      |          |
| Total                         | 9910      | 35 |          |      |          |

BLACK FEMALE GRE V

| <i>Data Summary</i> |         |          |          |          |   |         |
|---------------------|---------|----------|----------|----------|---|---------|
|                     | Samples |          |          |          |   |         |
|                     | 1       | 2        | 3        | 4        | 5 | Total   |
| N                   | 6       | 11       | 8        | 11       |   | 36      |
| $-\sum X$           | 249     | 442      | 460      | 743      |   | 1894    |
| -Mean               | 41.5    | 40.1818  | 57.5     | 67.5455  |   | 52.6111 |
| $-\sum X^2$         | 12797   | 24100    | 30722    | 54065    |   | 121684  |
| Variance            | 492.7   | 633.9636 | 610.2857 | 387.8727 |   | 629.673 |
| Std.Dev.            | 22.1968 | 25.1786  | 24.704   | 19.6945  |   | 25.0933 |
| Std.Err.            | 9.0618  | 7.5916   | 8.7342   | 5.9381   |   | 4.1822  |

| Source                        | SS         | df | MS        | F   | P        |
|-------------------------------|------------|----|-----------|-----|----------|
| Treatment<br>[between groups] | 5084.6919  | 3  | 1694.8973 | 3.2 | 0.036365 |
| Error                         | 16953.8636 | 32 | 529.8082  |     |          |
| Ss/Bl                         |            |    |           |     |          |
| Total                         | 22038.5556 | 35 |           |     |          |

### Tukey HSD Test

HSD[.05]=30.41; HSD[.01]=37.83

M1 vs M2 nonsignificant M1 vs M3 nonsignificant M1 vs M4 nonsignificant M2 vs M3  
nonsignificant M2 vs M4 nonsignificant M3 vs M4 nonsignificant

M1 = mean of Sample 1

M2 = mean of Sample 2 and so forth.

HSD = the absolute [unsigned] difference between any two sample means required for significance at the designated level. HSD[.05] for the .05 level; HSD[.01] for the .01 level.

### BLACK FEMALE GPA

| <i>Data Summary</i> |         |        |         |          |   |          |
|---------------------|---------|--------|---------|----------|---|----------|
|                     | Samples |        |         |          |   |          |
|                     | 1       | 2      | 3       | 4        | 5 | Total    |
| N                   | 6       | 11     | 8       | 11       |   | 36       |
| $-\sum X$           | 20.8    | 35.6   | 26.697  | 37.893   |   | 120.99   |
| -Mean               | 3.4667  | 3.2364 | 3.3371  | 3.4448   |   | 3.3608   |
| $-\sum X^2$         | 72.88   | 117.48 | 89.6508 | 131.3083 |   | 411.3191 |
| Variance            | 0.1547  | 0.2265 | 0.0799  | 0.0774   |   | 0.1341   |
| Std.Dev.            | 0.3933  | 0.476  | 0.2827  | 0.2782   |   | 0.3661   |
| Std.Err.            | 0.1606  | 0.1435 | 0.1     | 0.0839   |   | 0.061    |

| Source                        | SS     | df | MS     | F    | P        |
|-------------------------------|--------|----|--------|------|----------|
| Treatment<br>[between groups] | 0.3197 | 3  | 0.1066 | 0.78 | 0.513858 |
| Error                         | 4.3722 | 32 | 0.1366 |      |          |
| Ss/Bl                         |        |    |        |      |          |

Total 4.6919 35

HISPANIC FEMALE GRE Q

| <i>Data Summary</i> |          |          |          |          |   |          |
|---------------------|----------|----------|----------|----------|---|----------|
|                     | Samples  |          |          |          |   |          |
|                     | 1        | 2        | 3        | 4        | 5 | Total    |
| N                   | 20       | 30       | 31       | 22       |   | 103      |
| $-\sum X$           | 1069     | 1321     | 1429     | 1276     |   | 5095     |
| -Mean               | 53.45    | 44.0333  | 46.0968  | 58       |   | 49.466   |
| $-\sum X^2$         | 62411    | 71261    | 81647    | 82596    |   | 297915   |
| Variance            | 277.5237 | 451.4816 | 525.8237 | 408.9524 |   | 449.8591 |
| Std.Dev.            | 16.659   | 21.2481  | 22.9308  | 20.2226  |   | 21.2099  |
| Std.Err.            | 3.7251   | 3.8794   | 4.1185   | 4.3115   |   | 2.0899   |

| Source                        | SS         | df  | MS        | F    | P        |
|-------------------------------|------------|-----|-----------|------|----------|
| Treatment<br>[between groups] | 3157.0047  | 3   | 1052.3349 | 2.44 | 0.068859 |
| Error                         | 42728.6263 | 99  | 431.6023  |      |          |
| Ss/Bl                         |            |     |           |      |          |
| Total                         | 45885.6311 | 102 |           |      |          |

HISPANIC FEMALE GRE V

| <i>Data Summary</i> |          |          |          |          |   |          |
|---------------------|----------|----------|----------|----------|---|----------|
|                     | Samples  |          |          |          |   |          |
|                     | 1        | 2        | 3        | 4        | 5 | Total    |
| N                   | 20       | 30       | 31       | 22       |   | 103      |
| $-\sum X$           | 975      | 1214     | 1343     | 1388     |   | 4920     |
| -Mean               | 48.75    | 40.4667  | 43.3226  | 63.0909  |   | 47.767   |
| $-\sum X^2$         | 58223    | 64106    | 80601    | 97134    |   | 300064   |
| Variance            | 562.7237 | 516.5333 | 747.2925 | 455.4199 |   | 637.7491 |

|          |         |         |         |         |  |         |
|----------|---------|---------|---------|---------|--|---------|
| Std.Dev. | 23.7218 | 22.7274 | 27.3367 | 21.3406 |  | 25.2537 |
| Std.Err. | 5.3044  | 4.1494  | 4.9098  | 4.5498  |  | 2.4883  |

| Source                        | SS         | df  | MS        | F    | P        |
|-------------------------------|------------|-----|-----------|------|----------|
| Treatment<br>[between groups] | 7396.5987  | 3   | 2465.5329 | 4.23 | 0.007385 |
| Error                         | 57653.809  | 99  | 582.3617  |      |          |
| Ss/Bl                         |            |     |           |      |          |
| Total                         | 65050.4078 | 102 |           |      |          |

### Tukey HSD Test

HSD[.05]=17.9; HSD[.01]=21.9

M1 vs M2 nonsignificant M1 vs M3 nonsignificant M1 vs M4 nonsignificant M2 vs M3

nonsignificant M2 vs M4 P<.01

M3 vs M4 P<.05

M1 = mean of Sample 1

M2 = mean of Sample 2 and so forth.

HSD = the absolute [unsigned] difference between any two sample means required for significance at the designated level. HSD[.05] for the .05 level; HSD[.01] for the .01 level.

### HISPANIC FEMALE GPA

| Data Summary |         |        |          |          |   |           |
|--------------|---------|--------|----------|----------|---|-----------|
|              | Samples |        |          |          |   |           |
|              | 1       | 2      | 3        | 4        | 5 | Total     |
| N            | 20      | 30     | 31       | 22       |   | 103       |
| $-\sum X$    | 65.169  | 101.4  | 103.777  | 72.792   |   | 343.138   |
| -Mean        | 3.2585  | 3.38   | 3.3476   | 3.3087   |   | 3.3314    |
| $-\sum X^2$  | 215.946 | 346.68 | 352.2236 | 243.9666 |   | 1158.8162 |
| Variance     | 0.1893  | 0.1361 | 0.1605   | 0.1485   |   | 0.1537    |
| Std.Dev.     | 0.435   | 0.369  | 0.4006   | 0.3853   |   | 0.392     |
| Std.Err.     | 0.0973  | 0.0674 | 0.072    | 0.0821   |   | 0.0386    |

| Source                        | SS     | df | MS     | F    | P        |
|-------------------------------|--------|----|--------|------|----------|
| Treatment<br>[between groups] | 0.1968 | 3  | 0.0656 | 0.42 | 0.739049 |

|       |         |     |        |
|-------|---------|-----|--------|
| Error | 15.4768 | 99  | 0.1563 |
| Ss/Bl |         |     |        |
| Total | 15.6736 | 102 |        |

#### ASIAN FEMALE GRE Q

| <i>Data Summary</i> |          |          |          |          |   |          |
|---------------------|----------|----------|----------|----------|---|----------|
|                     | Samples  |          |          |          |   |          |
|                     | 1        | 2        | 3        | 4        | 5 | Total    |
| N                   | 14       | 20       | 18       | 10       |   | 62       |
| $-\sum X$           | 916      | 1400     | 1348     | 713      |   | 4377     |
| -Mean               | 65.4286  | 70       | 74.8889  | 71.3     |   | 70.5968  |
| $-\sum X^2$         | 62866    | 102836   | 105768   | 54809    |   | 326279   |
| Variance            | 225.6484 | 254.5263 | 283.3987 | 441.3444 |   | 283.2282 |
| Std.Dev.            | 15.0216  | 15.9539  | 16.8344  | 21.0082  |   | 16.8294  |
| Std.Err.            | 4.0147   | 3.5674   | 3.9679   | 6.6434   |   | 2.1373   |

| Source                        | SS         | df | MS       | F    | P        |
|-------------------------------|------------|----|----------|------|----------|
| Treatment<br>[between groups] | 717.613    | 3  | 239.2043 | 0.84 | 0.477495 |
| Error                         | 16559.3063 | 58 | 285.5053 |      |          |
| Ss/Bl                         |            |    |          |      |          |
| Total                         | 17276.9194 | 61 |          |      |          |

#### ASIAN FEMALE GRE V

| <i>Data Summary</i> |         |       |         |       |   |        |
|---------------------|---------|-------|---------|-------|---|--------|
|                     | Samples |       |         |       |   |        |
|                     | 1       | 2     | 3       | 4     | 5 | Total  |
| N                   | 14      | 20    | 18      | 10    |   | 62     |
| $-\sum X$           | 930     | 1289  | 1321    | 769   |   | 4309   |
| -Mean               | 66.4286 | 64.45 | 73.3889 | 76.9  |   | 69.5   |
| $-\sum X^2$         | 64656   | 90509 | 104007  | 62211 |   | 321383 |

|          |          |          |          |          |  |          |
|----------|----------|----------|----------|----------|--|----------|
| Variance | 221.3407 | 391.2079 | 415.3105 | 341.6556 |  | 359.1393 |
| Std.Dev. | 14.8775  | 19.779   | 20.3792  | 18.4839  |  | 18.951   |
| Std.Err. | 3.9762   | 4.4227   | 4.8034   | 5.8451   |  | 2.4068   |

| Source                        | SS         | df | MS       | F    | P        |
|-------------------------------|------------|----|----------|------|----------|
| Treatment<br>[between groups] | 1461.9437  | 3  | 487.3146 | 1.38 | 0.257928 |
| Error                         | 20445.5563 | 58 | 352.5096 |      |          |
| Ss/Bl                         |            |    |          |      |          |
| Total                         | 21907.5    | 61 |          |      |          |

#### ASIAN FEMALE GPA

| <i>Data Summary</i> |          |        |          |          |   |          |
|---------------------|----------|--------|----------|----------|---|----------|
|                     | Samples  |        |          |          |   |          |
|                     | 1        | 2      | 3        | 4        | 5 | Total    |
| N                   | 14       | 20     | 18       | 10       |   | 62       |
| $-\sum X$           | 44.937   | 64     | 59.93    | 35.68    |   | 204.547  |
| -Mean               | 3.2098   | 3.2    | 3.3294   | 3.568    |   | 3.2991   |
| $-\sum X^2$         | 145.7386 | 207.46 | 202.2105 | 128.4342 |   | 683.8433 |
| Variance            | 0.1154   | 0.14   | 0.1575   | 0.1253   |   | 0.1478   |
| Std.Dev.            | 0.3397   | 0.3742 | 0.3968   | 0.354    |   | 0.3844   |
| Std.Err.            | 0.0908   | 0.0837 | 0.0935   | 0.112    |   | 0.0488   |

| Source                        | SS     | df | MS     | F    | P        |
|-------------------------------|--------|----|--------|------|----------|
| Treatment<br>[between groups] | 1.0477 | 3  | 0.3492 | 2.54 | 0.065206 |
| Error                         | 7.9653 | 58 | 0.1373 |      |          |
| Ss/Bl                         |        |    |        |      |          |
| Total                         | 9.013  | 61 |        |      |          |

NATIVE FEMALE GRE Q

| <i>Data Summary</i> |         |      |      |        |   |          |
|---------------------|---------|------|------|--------|---|----------|
|                     | Samples |      |      |        |   |          |
|                     | 1       | 2    | 3    | 4      | 5 | Total    |
| N                   | 2       | 1    | 1    | 2      |   | 6        |
| $-\sum X$           | 152     | 49   | 49   | 108    |   | 358      |
| -Mean               | 76      | 49   | 49   | 54     |   | 59.6667  |
| $-\sum X^2$         | 11840   | 2401 | 2401 | 5904   |   | 22546    |
| Variance            | 288     | NaN  | NaN  | 72     |   | 237.0667 |
| Std.Dev.            | 16.9706 | NaN  | NaN  | 8.4853 |   | 15.397   |
| Std.Err.            | 12      | NaN  | NaN  | 6      |   | 6.2858   |

| Source                        | SS        | df | MS       | F    | P        |
|-------------------------------|-----------|----|----------|------|----------|
| Treatment<br>[between groups] | 825.3333  | 3  | 275.1111 | 1.53 | 0.418713 |
| Error                         | 360       | 2  | 180      |      |          |
| Ss/Bl                         |           |    |          |      |          |
| Total                         | 1185.3333 | 5  |          |      |          |

NATIVE FEMALE GRE V

| <i>Data Summary</i> |         |      |      |         |   |         |
|---------------------|---------|------|------|---------|---|---------|
|                     | Samples |      |      |         |   |         |
|                     | 1       | 2    | 3    | 4       | 5 | Total   |
| N                   | 2       | 1    | 1    | 2       |   | 6       |
| $-\sum X$           | 132     | 51   | 51   | 120     |   | 354     |
| -Mean               | 66      | 51   | 51   | 60      |   | 59      |
| $-\sum X^2$         | 9864    | 2601 | 2601 | 7922    |   | 22988   |
| Variance            | 1152    | NaN  | NaN  | 722     |   | 420.4   |
| Std.Dev.            | 33.9411 | NaN  | NaN  | 26.8701 |   | 20.5037 |
| Std.Err.            | 24      | NaN  | NaN  | 19      |   | 8.3706  |

| Source                        | SS   | df | MS  | F    | P        |
|-------------------------------|------|----|-----|------|----------|
| Treatment<br>[between groups] | 228  | 3  | 76  | 0.08 | 0.964929 |
| Error                         | 1874 | 2  | 937 |      |          |
| Ss/Bl                         |      |    |     |      |          |
| Total                         | 2102 | 5  |     |      |          |

#### NATIVE FEMALE GPA

| <i>Data Summary</i> |         |      |      |         |   |         |
|---------------------|---------|------|------|---------|---|---------|
|                     | Samples |      |      |         |   |         |
|                     | 1       | 2    | 3    | 4       | 5 | Total   |
| N                   | 2       | 1    | 1    | 2       |   | 6       |
| $-\sum X$           | 6.874   | 2.8  | 2.8  | 7.79    |   | 20.264  |
| -Mean               | 3.437   | 2.8  | 2.8  | 3.895   |   | 3.3773  |
| $-\sum X^2$         | 23.7643 | 7.84 | 7.84 | 30.3445 |   | 69.7888 |
| Variance            | 0.1383  | NaN  | NaN  | 0.0024  |   | 0.2701  |
| Std.Dev.            | 0.3719  | NaN  | NaN  | 0.0495  |   | 0.5197  |
| Std.Err.            | 0.263   | NaN  | NaN  | 0.035   |   | 0.2122  |

| Source                        | SS     | df | MS     | F    | P        |
|-------------------------------|--------|----|--------|------|----------|
| Treatment<br>[between groups] | 1.2097 | 3  | 0.4032 | 5.73 | 0.152184 |
| Error                         | 0.1408 | 2  | 0.0704 |      |          |
| Ss/Bl                         |        |    |        |      |          |
| Total                         | 1.3505 | 5  |        |      |          |

#### WHITE FEMALE GRE Q

| <i>Data Summary</i> |         |      |      |      |   |       |
|---------------------|---------|------|------|------|---|-------|
|                     | Samples |      |      |      |   |       |
|                     | 1       | 2    | 3    | 4    | 5 | Total |
| N                   | 98      | 94   | 74   | 74   |   | 340   |
| $-\sum X$           | 6296    | 6029 | 5012 | 5091 |   | 22428 |



|             |          |          |          |          |  |          |
|-------------|----------|----------|----------|----------|--|----------|
| -Mean       | 64.2449  | 64.1383  | 67.7297  | 68.7973  |  | 65.9647  |
| $-\sum X^2$ | 430838   | 408725   | 357970   | 368931   |  | 1566464  |
| Variance    | 271.6714 | 236.9377 | 253.5424 | 255.9447 |  | 256.6595 |
| Std.Dev.    | 16.4825  | 15.3928  | 15.923   | 15.9983  |  | 16.0206  |
| Std.Err.    | 1.665    | 1.5876   | 1.851    | 1.8598   |  | 0.8688   |

| Source                        | SS         | df  | MS       | F    | P        |
|-------------------------------|------------|-----|----------|------|----------|
| Treatment<br>[between groups] | 1427.6978  | 3   | 475.8993 | 1.87 | 0.134399 |
| Error                         | 85579.8786 | 336 | 254.702  |      |          |
| Ss/Bl                         |            |     |          |      |          |
| Total                         | 87007.5765 | 339 |          |      |          |

#### WHITE FEMALE GRE V

| <i>Data Summary</i> |          |          |          |          |   |          |
|---------------------|----------|----------|----------|----------|---|----------|
|                     | Samples  |          |          |          |   |          |
|                     | 1        | 2        | 3        | 4        | 5 | Total    |
| N                   | 98       | 94       | 74       | 74       |   | 340      |
| $-\sum X$           | 6123     | 6148     | 5192     | 5395     |   | 22858    |
| -Mean               | 62.4796  | 65.4043  | 70.1622  | 72.9054  |   | 67.2294  |
| $-\sum X^2$         | 417411   | 433924   | 387412   | 416205   |   | 1654952  |
| Variance            | 359.2625 | 342.1359 | 316.8501 | 313.4293 |   | 348.7378 |
| Std.Dev.            | 18.9542  | 18.4969  | 17.8003  | 17.7039  |   | 18.6745  |
| Std.Err.            | 1.9147   | 1.9078   | 2.0692   | 2.058    |   | 1.0128   |

| Source                        | SS          | df  | MS        | F    | P        |
|-------------------------------|-------------|-----|-----------|------|----------|
| Treatment<br>[between groups] | 5544.6165   | 3   | 1848.2055 | 5.51 | 0.001051 |
| Error                         | 112677.4894 | 336 | 335.3497  |      |          |
| Ss/Bl                         |             |     |           |      |          |
| Total                         | 118222.1059 | 339 |           |      |          |

### Tukey HSD Test

HSD[.05]=7.33; HSD[.01]=8.9

M1 vs M2 nonsignificant

M1 vs M3 P<.05

M1 vs M4 P<.01

M2 vs M3 nonsignificant

M2 vs M4 P<.05

M3 vs M4 nonsignificant

M1 = mean of Sample 1

M2 = mean of Sample 2 and so forth.

HSD = the absolute [unsigned] difference between any two sample means required for significance at the designated level. HSD[.05] for the .05 level; HSD[.01] for the .01 level.

### WHITE FEMALE GPA

| <i>Data Summary</i> |           |           |          |           |   |           |
|---------------------|-----------|-----------|----------|-----------|---|-----------|
|                     | Samples   |           |          |           |   |           |
|                     | 1         | 2         | 3        | 4         | 5 | Total     |
| N                   | 97        | 94        | 74       | 74        |   | 339       |
| $-\sum X$           | 323.719   | 322.161   | 252.704  | 264.351   |   | 1162.935  |
| -Mean               | 3.3373    | 3.4272    | 3.4149   | 3.5723    |   | 3.4305    |
| $-\sum X^2$         | 1112.8369 | 1112.5013 | 871.4746 | 1018.2747 |   | 4115.0875 |
| Variance            | 0.3384    | 0.0901    | 0.1166   | 1.0127    |   | 0.3718    |
| Std.Dev.            | 0.5817    | 0.3001    | 0.3414   | 1.0064    |   | 0.6097    |
| Std.Err.            | 0.0591    | 0.031     | 0.0397   | 0.117     |   | 0.0331    |

| Source                        | SS       | df  | MS     | F    | P        |
|-------------------------------|----------|-----|--------|------|----------|
| Treatment<br>[between groups] | 2.3495   | 3   | 0.7832 | 2.13 | 0.096223 |
| Error                         | 123.3049 | 335 | 0.3681 |      |          |
| Ss/Bl                         |          |     |        |      |          |
| Total                         | 125.6544 | 338 |        |      |          |

DISABLED FEMALE GRE Q

| <i>Data Summary</i> |         |     |        |          |   |          |
|---------------------|---------|-----|--------|----------|---|----------|
|                     | Samples |     |        |          |   |          |
|                     | 1       | 2   | 3      | 4        | 5 | Total    |
| N                   | 0       | 0   | 2      | 16       |   | 18       |
| $-\sum X$           | 0       | 0   | 85     | 835      |   | 920      |
| -Mean               | NaN     | NaN | 42.5   | 52.1875  |   | 51.1111  |
| $-\sum X^2$         | 0       | 0   | 4717   | 49461    |   | 54178    |
| Variance            | NaN     | NaN | 1104.5 | 392.2958 |   | 420.9281 |
| Std.Dev.            | NaN     | NaN | 33.234 | 19.8065  |   | 20.5165  |
| Std.Err.            | NaN     | NaN | 23.5   | 4.9516   |   | 4.8358   |

| Source                        | SS        | df | MS  | F | P        |
|-------------------------------|-----------|----|-----|---|----------|
| Treatment<br>[between groups] | NaN       | 3  | NaN | 0 | 1.000000 |
| Error                         | NaN       | 14 | NaN |   |          |
| Ss/Bl                         |           |    |     |   |          |
| Total                         | 7155.7778 | 17 |     |   |          |

DISABLED FEMALE GRE V

| <i>Data Summary</i> |         |     |         |          |   |          |
|---------------------|---------|-----|---------|----------|---|----------|
|                     | Samples |     |         |          |   |          |
|                     | 1       | 2   | 3       | 4        | 5 | Total    |
| N                   | 0       | 0   | 2       | 16       |   | 18       |
| $-\sum X$           | 0       | 0   | 148     | 1072     |   | 1220     |
| -Mean               | NaN     | NaN | 74      | 67       |   | 67.7778  |
| $-\sum X^2$         | 0       | 0   | 11600   | 75672    |   | 87272    |
| Variance            | NaN     | NaN | 648     | 256.5333 |   | 269.5948 |
| Std.Dev.            | NaN     | NaN | 25.4558 | 16.0167  |   | 16.4193  |
| Std.Err.            | NaN     | NaN | 18      | 4.0042   |   | 3.8701   |

| Source                        | SS        | df | MS  | F | P        |
|-------------------------------|-----------|----|-----|---|----------|
| Treatment<br>[between groups] | NaN       | 3  | NaN | 0 | 1.000000 |
| Error                         | NaN       | 14 | NaN |   |          |
| Ss/Bl                         |           |    |     |   |          |
| Total                         | 4583.1111 | 17 |     |   |          |

### DISABLED FEMALE GPA

| <i>Data Summary</i> |         |     |         |          |   |         |
|---------------------|---------|-----|---------|----------|---|---------|
|                     | Samples |     |         |          |   |         |
|                     | 1       | 2   | 3       | 4        | 5 | Total   |
| N                   | 0       | 0   | 2       | 16       |   | 18      |
| $-\sum X$           | 0       | 0   | 5.824   | 54.453   |   | 60.277  |
| -Mean               | NaN     | NaN | 2.912   | 3.4033   |   | 3.3487  |
| $-\sum X^2$         | 0       | 0   | 17.1219 | 187.5141 |   | 204.636 |
| Variance            | NaN     | NaN | 0.1624  | 0.1462   |   | 0.1638  |
| Std.Dev.            | NaN     | NaN | 0.4031  | 0.3824   |   | 0.4048  |
| Std.Err.            | NaN     | NaN | 0.285   | 0.0956   |   | 0.0954  |

| Source                        | SS     | df | MS  | F | P        |
|-------------------------------|--------|----|-----|---|----------|
| Treatment<br>[between groups] | NaN    | 3  | NaN | 0 | 1.000000 |
| Error                         | NaN    | 14 | NaN |   |          |
| Ss/Bl                         |        |    |     |   |          |
| Total                         | 2.7851 | 17 |     |   |          |

Supplemental Figure 3. Chi-square test and Fischer's exact test

| Domestic Male Students                           |                                                                                                            |                   |                             |                   |           |                             |
|--------------------------------------------------|------------------------------------------------------------------------------------------------------------|-------------------|-----------------------------|-------------------|-----------|-----------------------------|
|                                                  | Pre-Intervention                                                                                           |                   |                             | Post-Intervention |           |                             |
|                                                  | Applied                                                                                                    | Offered Admission | Accepted Offer of Admission | Applied           | Offered A | Accepted Offer of Admission |
| Majority Males                                   | 359                                                                                                        | 105               | 63                          | 372               | 93        | 54                          |
| URM Males                                        | 120                                                                                                        | 23                | 12                          | 177               | 109       | 18                          |
| Pre-Intervention vs Pre-Intervention             | Chi-square = 5.06, p = 0.0797                                                                              |                   |                             |                   |           |                             |
| Post-Intervention vs Post-Intervention           | Chi-square = 34.73, p = 0.00001                                                                            |                   |                             |                   |           |                             |
| Pre-Intervention vs Post-Intervention (majority) | Chi-square = 1.59, p = 0.452                                                                               |                   |                             |                   |           |                             |
| Pre-Intervention vs Post-Intervention (URM)      | Chi-square = 22.3, p = 0.000016                                                                            |                   |                             |                   |           |                             |
|                                                  | Fischer: applied vs offered (p < 0.0001), offered vs accepted (p < 0.0001), applied vs accepted (p = 0.21) |                   |                             |                   |           |                             |
|                                                  | Fischer: applied vs offered (p < 0.0001), offered vs accepted (p = 0.0067), applied vs accepted (p = 1)    |                   |                             |                   |           |                             |
| Domestic Female Students                         |                                                                                                            |                   |                             |                   |           |                             |
|                                                  | Pre-Intervention                                                                                           |                   |                             | Post-Intervention |           |                             |
|                                                  | Applied                                                                                                    | Offered Admission | Accepted Offer of Admission | Applied           | Offered A | Accepted Offer of Admission |
| Majority Females                                 | 383                                                                                                        | 138               | 78                          | 491               | 159       | 71                          |
| URM Females                                      | 174                                                                                                        | 51                | 30                          | 318               | 69        | 44                          |
| Pre-Intervention vs Pre-Intervention             | Chi-square = 1.48, p = 0.477                                                                               |                   |                             |                   |           |                             |
| Post-Intervention vs Post-Intervention           | Chi-square = 6.25, p = 0.0439                                                                              |                   |                             |                   |           |                             |
| Pre-Intervention vs Post-Intervention (majority) | Chi-square = 3.92, p = 0.141                                                                               |                   |                             |                   |           |                             |
| Pre-Intervention vs Post-Intervention (URM)      | Chi-square = 2.51, p = 0.285                                                                               |                   |                             |                   |           |                             |
|                                                  | Fischer: applied vs offered (p = 0.013), offered vs accepted (p = 0.137), applied vs accepted (p = 0.823)  |                   |                             |                   |           |                             |

Supplemental Table 1. Example Scoring Sheet

| <b>Applicant Name</b> | <b>Research Experience</b> | <b>Rec Letters</b> | <b>Personal Statement</b> | <b>Quantitative Measures</b> | <b>Overall Score</b> |
|-----------------------|----------------------------|--------------------|---------------------------|------------------------------|----------------------|
| Applicant 1           | 3                          | 3                  | 3                         | 3                            | 3                    |
| Applicant 2           | 3                          | 4                  | 3                         | 5                            | 4                    |
